# Supplementary material for: Multivariate pattern analysis links drug use severity to distributed cortical hypoactivity during emotional inhibitory control in opioid use disorder
Source: PubMed Central journal article supplement — Neuroimage Clin. 2021 Aug 29;32:102806. doi: 10.1016/j.nicl.2021.102806 (PMC8436158; doi:10.1016/j.nicl.2021.102806), 2021-08-29
Supplement: mmc1.pdf [file mmc1.pdf]

# 1 **Multivariate pattern analysis links drug use severity to distributed cortical hypoactivity during emotional** 2 **inhibitory control in opioid use disorder**

3 Zhenhao Shi, PhD, Daniel D. Langleben, MD, Charles P. O'Brien, MD, PhD, Anna Rose Childress, PhD, Corinde E. Wiers,  
4 PhD

5 Center for Studies of Addiction, Department of Psychiatry, University of Pennsylvania Perelman School of Medicine, 3535  
6 Market St Ste 500, Philadelphia, PA 19104

7

8

## 9 **SUPPLEMENTARY INFORMATION**

### 10 **1. Mass-univariate analyses**

11 Using a conventional mass-univariate approach, the individual “no-go vs. go” contrast images were subjected to (1) a  
12 one-sample t-test to identify brain regions showing an overall emotional inhibition effect, and (2) linear regression to identify an  
13 association between neural responses and drug use severity. Significant regions were determined using the threshold-free  
14 cluster-enhancement (TFCE) algorithm at cluster-level corrected  $p < 0.05$  (Smith and Nichols, 2009). The advantage of the  
15 TFCE algorithm is that it does not depend on an arbitrary cluster-forming threshold (i.e. voxel-level threshold) (Eklund et al.,  
16 2016) and is robust to the level of spatial smoothness (Smith and Nichols, 2009). We found that compared to go stimuli, no-go  
17 stimuli induced greater neural response in a number of regions listed in **Table S1** and shown in **Figure S1A**. No region showed  
18 significantly lower activity in response to no-go compared to go stimuli. We also found that drug use severity was negatively  
19 associated with neural response to no-go vs. go stimuli in the regions listed in **Table S2** and shown in **Figure S1B**. No region  
20 showed significantly positive association between drug use severity and neural response.

21 We additionally applied a threshold of voxel-level uncorrected  $p < 0.001$  combined with cluster-level  $p < 0.05$  corrected for  
22 familywise error (FWE) based on random field theory implemented in SPM 12. Regions showing greater neural response to  
23 no-go compared to go stimuli at this threshold are summarized in **Table S3**. No region showed greater neural response to go  
24 compared to no-go stimuli. Regions showing negative correlation between drug use severity and neural response to no-go vs. go  
25 stimuli revealed by regression analysis are summarized in **Table S4**. No region showed positive correlation with drug use  
26 severity.

27 We also applied a threshold of voxel-level FWE-corrected  $p < 0.05$ . No region showed greater or weaker neural response to  
28 no-go compared to go stimuli at this threshold. Regions showing negative correlation between drug use severity and neural  
29 response to no-go vs. go stimuli revealed by regression analysis are summarized in **Table S5**. No region showed positive  
30 correlation with drug use severity.

### 31 **2. Exploratory PLSR analysis on craving**

32 We investigated the ability of brain activity to account for the individual differences in baseline and on-treatment opioid  
33 craving following the same PLSR analysis procedure described in the main article. We found that the cross-validated prediction  
34 error was significantly lower than those obtained from a 5000-iteration permutation test for on-treatment craving (observed  
35  $MSE = 6.62$ , 5th percentile of null MSE distribution =  $7.05$ ,  $p = 0.030$ ) but only marginally so for baseline craving (observed  
36  $MSE = 6.20$ , 5th percentile of null MSE distribution =  $6.04$ ,  $p = 0.063$ ). This is consistent with the finding that the PLSR score for  
37 drug use severity was more correlated with on-treatment craving than baseline craving, as reported in the main text. The optimal  
38 number of latent components across CV iterations was more variable for baseline craving (mean  $\pm$  SD =  $1.58 \pm 1.44$ , range = 1–10)  
39 and on-treatment craving ( $1.12 \pm 0.56$ , range = 1–4) than for drug use severity ( $1.02 \pm 0.20$ , range = 1–3, see the main text). This  
40 may be due to subjective nature of craving and its susceptibility to several factors such as cognitive bias and memory  
41 inaccuracy (Sayette et al., 2000). Additional PLSR analysis on raw craving reduction (baseline minus on-treatment) and  
42 baseline-adjusted craving reduction did not show any significant association with neural response (raw, observed  $MSE = 8.07$ ,  
43 5th percentile of null MSE distribution =  $6.14$ ,  $p = 0.34$ ; baseline adjusted, observed  $MSE = 6.30$ , 5th percentile of null MSE  
44 distribution =  $5.12$ ,  $p = 0.25$ ).

### 1 3. Results from analyses that included the participant with excessive head motion

2 Consistent with the main analyses, drug use severity was associated with distributed brain hypoactivity in response to the  
3 no-go vs. go stimuli, as evidenced by significantly negative loadings in 879 of the 1000 cortical parcels (FDR-corrected  
4  $p$ 's<0.05). No regions showed significantly positive loadings. Of the 7 brain networks, the CCN and DAN had significantly  
5 more negative normalized engagement metrics compared to the average of other networks (CCN vs. others, -0.26 vs. -0.19, 95%  
6 bootstrap CI of difference=-0.11 to -0.02, FDR-corrected  $p$ =0.027; DAN vs. others, -0.27 vs. -0.19, 95% bootstrap CI of  
7 difference=-0.13 to -0.02, FDR-corrected  $p$ =0.030), while the LN engagement was significantly less negative than the average  
8 of other networks (-0.12 vs. -0.21, 95% bootstrap CI of difference=0.07 to 0.17, FDR-corrected  $p$ <0.001). The cross-validated  
9 prediction error was significantly lower than those obtained from a 5000-iteration permutation test (observed MSE=0.011, 5th  
10 percentile of null MSE distribution=0.011,  $p$ =0.046).

11 Drug use severity was significantly correlated with baseline opioid craving ( $r$ =0.43,  $p$ =0.027) but not on-treatment opioid  
12 craving ( $r$ =0.40,  $p$ =0.068). The PLSR brain score obtained from the multivariate neural response pattern was significantly  
13 correlated with both baseline opioid craving ( $r$ =0.46,  $p$ =0.018) and on-treatment opioid craving ( $r$ =0.62,  $p$ =0.002).  
14 Commonality analyses showed that the brain score and drug use severity made comparable unique contributions in accounting  
15 for the variance in baseline craving ( $\Delta R^2$ =2.24%, 95% bootstrap CI=-22.20% to 22.61%,  $p$ =0.77). For on-treatment craving, the  
16 brain score made significantly greater unique contribution than drug use severity ( $\Delta R^2$ =23.06%, 95% bootstrap CI=2.81% to  
17 48.71%,  $p$ =0.023). Such greater contribution remained significant after on-treatment craving was adjusted for baseline craving  
18 ( $\Delta R^2$ =16.23%, 95% bootstrap CI=0.53% to 43.91%,  $p$ =0.044).

### 19 4. References

- 20 Eklund, A., Nichols, T.E., Knutsson, H., 2016. Cluster failure: why fMRI inferences for spatial extent have inflated  
21 false-positive rates. *Proceedings of the National Academy of Sciences of the United States of America* 113, 7900-7905.
- 22 Sayette, M.A., Shiffman, S., Tiffany, S.T., Niaura, R.S., Martin, C.S., Shadel, W.G., 2000. The measurement of drug craving.  
23 *Addiction* 95, S189-S210.
- 24 Smith, S.M., Nichols, T.E., 2009. Threshold-free cluster enhancement: addressing problems of smoothing, threshold  
25 dependence and localisation in cluster inference. *NeuroImage* 44, 83-98.

26

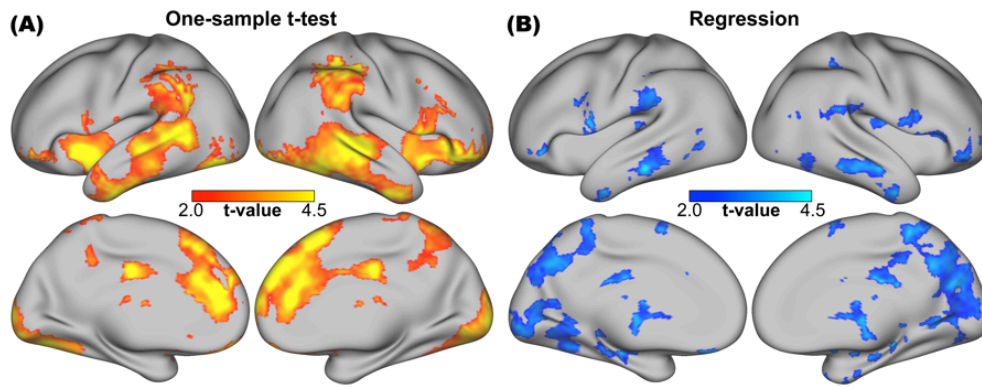

1  
2  
3  
4  
5

**Figure S1.** Results of mass-univariate analyses (thresholded at corrected  $p < 0.05$  using threshold-free cluster enhancement). **(A)** Regions showing greater neural response to no-go compared to go stimuli. **(B)** Regions showing negative correlation between drug use severity and neural response to no-go vs. go stimuli revealed by regression analysis.

1 **Table S1.** Regions showing greater neural response to no-go compared to go stimuli (threshold-free cluster enhancement)

| Region                         | Cluster extent | Z    | MNI coordinates |
|--------------------------------|----------------|------|-----------------|
| Left cerebellum                | 18272          | 5.66 | -33/-85/-28     |
| Anterior cingulate cortex      |                | 5.34 | 0/41/20         |
| Right lingual gyrus            |                | 5.24 | 3/-82/-10       |
| Left occipital pole            |                | 5.09 | -6/-103/2       |
| Right superior frontal gyrus   |                | 5.00 | 18/50/38        |
| Right middle temporal gyrus    |                | 4.81 | 57/-43/-1       |
| Right angular gyrus            |                | 4.75 | 45/-52/41       |
| Right fusiform gyrus           |                | 4.59 | 33/-88/-22      |
| Left middle temporal gyrus     |                | 4.53 | -66/-43/-1      |
| Right orbitofrontal gyrus      |                | 4.52 | 45/26/-19       |
| Right cerebellum               |                | 4.51 | 30/-82/-31      |
| Right occipital pole           |                | 4.50 | 18/-100/-1      |
| Left inferior occipital gyrus  |                | 4.49 | -33/-97/2       |
| Supplementary motor area       |                | 4.47 | 0/2/71          |
| Dorsomedial prefrontal cortex  |                | 4.47 | -3/35/50        |
| Left superior frontal gyrus    |                | 4.43 | -18/53/26       |
| Right inferior temporal gyrus  |                | 4.27 | 51/-7/-40       |
| Right supramarginal gyrus      |                | 4.23 | 54/-34/56       |
| Mid-cingulate cortex           |                | 4.21 | 0/-19/38        |
| Left inferior temporal gyrus   |                | 4.20 | -45/-25/-31     |
| Right middle frontal gyrus     |                | 4.16 | 45/35/26        |
| Right superior parietal lobule |                | 4.13 | 42/-46/59       |
| Right anterior insula          |                | 4.13 | 36/11/-13       |
| Left orbitofrontal cortex      |                | 4.04 | -21/53/-16      |
| Left postcentral gyrus         |                | 3.74 | 0/-43/71        |
| Right inferior frontal gyrus   |                | 3.74 | 57/20/5         |
| Right temporal pole            |                | 3.62 | 57/14/-16       |
| Left temporal pole             |                | 3.47 | -45/5/-46       |
| Left middle frontal gyrus      |                | 3.43 | -36/59/2        |
| Left superior parietal lobule  |                | 3.41 | -45/-40/56      |
| Right frontal pole             |                | 3.34 | 18/65/-1        |
| Cerebellar vermis              |                | 3.34 | -6/-64/-37      |
| Left supramarginal gyrus       |                | 3.24 | -51/-34/53      |
| Right hippocampus              |                | 3.15 | 21/-19/-13      |
| Precuneus                      |                | 3.10 | -6/-52/71       |
| Right precentral gyrus         |                | 3.04 | 6/-25/74        |
| Left inferior frontal gyrus    |                | 2.95 | -57/17/17       |
| Right posterior insula         |                | 2.95 | 36/-19/2        |
| Left fusiform gyrus            |                | 2.84 | -36/-22/-28     |
| Left superior temporal gyrus   |                | 2.71 | -60/-4/-4       |
| Right superior temporal gyrus  |                | 2.61 | 63/-4/-4        |
| Medial orbitofrontal gyrus     |                | 2.50 | -6/29/-31       |
| Left transverse temporal gyrus |                | 2.37 | -57/-16/8       |
| Left frontal pole              |                | 2.36 | -12/65/-13      |
| Left entorhinal area           |                | 2.18 | -15/5/-28       |
| Left middle frontal gyrus      | 248            | 4.28 | -39/14/44       |
| Right entorhinal area          | 33             | 3.42 | 15/-1/-34       |
| Right thalamus                 | 108            | 2.96 | 6/-4/8          |
| Left thalamus                  |                | 2.65 | -3/-16/14       |
| Cerebellar vermis              | 27             | 2.69 | 3/-58/-4        |
| Right cerebellum               | 30             | 2.62 | 6/-55/-22       |
| Right cerebellum               | 11             | 2.35 | 6/-46/-61       |

**Note:** Significant regions identified at cluster-level  $p < 0.05$  using the threshold-free cluster-enhancement algorithm; cluster extent represents number of voxels with  $3 \times 3 \times 3$  mm<sup>3</sup> spatial resolution; MNI, Montreal Neurological Institute.

2

1 **Table S2.** Regions showing negative correlation between drug use severity and neural response (threshold-free cluster enhancement)

| <b>Region</b>                                 | <b>Cluster extent</b> | <b>Z</b> | <b>MNI coordinates</b> |
|-----------------------------------------------|-----------------------|----------|------------------------|
| Supplementary motor area                      | 11347                 | 4.60     | 3/2/71                 |
| Left fusiform gyrus                           |                       | 4.18     | -39/-34/-25            |
| Right fusiform gyrus                          |                       | 4.17     | 42/-34/-19             |
| Right middle frontal gyrus                    |                       | 3.93     | 33/2/62                |
| Precuneus                                     |                       | 3.85     | -3/-73/44              |
| Left inferior temporal gyrus                  |                       | 3.77     | -60/-31/-22            |
| Cuneus                                        |                       | 3.69     | -6/-82/38              |
| Right cerebellum                              |                       | 3.68     | 27/-34/-37             |
| Left cerebellum                               |                       | 3.52     | -24/-61/-31            |
| Right middle temporal gyrus                   |                       | 3.47     | 51/-4/-34              |
| Right superior parietal lobule                |                       | 3.40     | 24/-40/62              |
| Mid-cingulate cortex                          |                       | 3.28     | 3/-22/29               |
| Cerebellar vermis                             |                       | 3.27     | -6/-52/-19             |
| Right middle occipital gyrus                  |                       | 3.22     | 45/-73/23              |
| Right angular gyrus                           |                       | 3.21     | 36/-61/44              |
| Right lingual gyrus                           |                       | 3.20     | 12/-67/-4              |
| Right inferior frontal gyrus                  |                       | 3.10     | 51/17/11               |
| Right supramarginal gyrus                     |                       | 3.06     | 39/-34/41              |
| Left parahippocampal gyrus                    |                       | 3.05     | -27/-22/-31            |
| Posterior cingulate cortex                    |                       | 3.02     | 3/-31/26               |
| Left lingual gyrus                            |                       | 3.02     | -18/-61/-7             |
| Right frontal pole                            |                       | 3.00     | 30/65/-7               |
| Left superior parietal lobule                 |                       | 2.97     | -9/-70/62              |
| Right precentral gyrus                        |                       | 2.95     | 54/11/20               |
| Left orbitofrontal gyrus                      |                       | 2.94     | -24/8/-25              |
| Right anterior insula                         |                       | 2.94     | 36/11/-10              |
| Right inferior temporal gyrus                 |                       | 2.94     | 63/-37/-22             |
| Right calcarine cortex                        |                       | 2.92     | 6/-88/5                |
| Left supramarginal gyrus                      |                       | 2.90     | -63/-31/26             |
| Right inferior occipital gyrus                |                       | 2.86     | 39/-85/-4              |
| Right parahippocampal gyrus                   |                       | 2.83     | 21/-16/-34             |
| Left calcarine cortex                         |                       | 2.81     | -6/-82/5               |
| Left transverse temporal gyrus                |                       | 2.78     | -51/-19/8              |
| Right superior temporal gyrus                 |                       | 2.78     | 66/-40/20              |
| Left central operculum                        |                       | 2.77     | -63/-16/11             |
| Right posterior insula                        |                       | 2.73     | 33/-19/14              |
| Right temporal pole                           |                       | 2.71     | 39/11/-46              |
| Right central operculum                       |                       | 2.70     | 51/-7/8                |
| Right orbitofrontal cortex                    |                       | 2.65     | 42/53/-13              |
| Left hippocampus                              |                       | 2.64     | -21/-22/-10            |
| Left inferior occipital gyrus                 |                       | 2.61     | -54/-70/-7             |
| Left occipital pole                           |                       | 2.51     | -9/-100/-13            |
| Right superior frontal gyrus                  |                       | 2.48     | 24/50/23               |
| Left middle temporal gyrus                    |                       | 2.47     | -66/-37/-10            |
| Left superior occipital gyrus                 |                       | 2.41     | -21/-85/26             |
| Right postcentral gyrus                       |                       | 2.24     | 60/-13/32              |
| Right hippocampus                             |                       | 2.23     | 27/-37/-1              |
| Right parietal operculum                      |                       | 2.21     | 45/-22/17              |
| Left postcentral gyrus                        |                       | 2.20     | -24/-37/59             |
| Left planum temporale                         |                       | 2.20     | -51/-28/8              |
| Right ventral tegmental area/substantia nigra | 963                   | 3.82     | 9/-10/-10              |
| Left caudate                                  |                       | 3.59     | -9/17/5                |
| Medial orbitofrontal gyrus                    |                       | 3.35     | -12/47/-25             |
| Right caudate                                 |                       | 3.33     | 12/17/-1               |
| Right thalamus                                |                       | 3.23     | 3/-4/11                |
| Left orbitofrontal gyrus                      |                       | 3.20     | -45/50/-10             |
| Left middle frontal gyrus                     |                       | 3.14     | -42/56/5               |
| Right orbitofrontal gyrus                     |                       | 3.08     | 21/14/-28              |
| Left middle frontal gyrus                     | 73                    | 3.57     | -30/8/56               |
| Left inferior temporal gyrus                  | 91                    | 3.30     | -39/-1/-49             |
| Left middle temporal gyrus                    |                       | 3.12     | -51/-1/-40             |
| Left thalamus                                 | 24                    | 3.27     | -3/-19/14              |
| Right thalamus                                |                       | 2.82     | 6/-19/17               |
| Left middle frontal gyrus                     | 245                   | 3.27     | -48/8/47               |
| Left inferior frontal gyrus                   |                       | 3.18     | -60/11/14              |
| Left cerebellum                               | 38                    | 3.22     | -48/-49/-40            |
| Left anterior insula                          | 18                    | 2.72     | -39/2/2                |

1 **Table S2.** (Continued)

|                           |    |      |            |
|---------------------------|----|------|------------|
| Anterior cingulate cortex | 15 | 2.46 | -9/26/29   |
| Right cerebellum          | 12 | 2.36 | 18/-43/-58 |
| Anterior cingulate cortex | 25 | 2.28 | 12/26/32   |
| Mid-cingulate cortex      |    | 2.14 | 6/17/26    |
| Right cerebellum          | 10 | 2.24 | 39/-79/-40 |

**Note:** Significant regions identified at cluster-level  $p < 0.05$  using the threshold-free cluster-enhancement algorithm; cluster extent represents number of voxels with  $3 \times 3 \times 3$  mm<sup>3</sup> spatial resolution; MNI, Montreal Neurological Institute.

2

1 **Table S3.** Regions showing greater neural response to no-go compared to go stimuli (conventional cluster-level  $p < 0.05$ )

| Region                         | Cluster extent | Z    | MNI coordinates |
|--------------------------------|----------------|------|-----------------|
| Left cerebellum                | 2886           | 5.66 | -33/-85/-28     |
| Right lingual gyrus            |                | 5.24 | 3/-82/-10       |
| Left occipital pole            |                | 5.09 | -6/-103/2       |
| Right middle temporal gyrus    |                | 4.81 | 57/-43/-1       |
| Right fusiform gyrus           |                | 4.59 | 33/-88/-22      |
| Right cerebellum               |                | 4.51 | 30/-82/-31      |
| Right occipital pole           |                | 4.50 | 18/-100/-1      |
| Left inferior occipital cortex |                | 4.49 | -33/-97/2       |
| Right inferior temporal gyrus  |                | 4.19 | 54/-34/-22      |
| Left fusiform gyrus            |                | 3.89 | -15/-97/-13     |
| Left orbitofrontal cortex      | 262            | 5.59 | -39/20/-19      |
| Left inferior frontal gyrus    |                | 3.70 | -51/35/-10      |
| Anterior cingulate gyrus       | 1894           | 5.34 | 0/41/20         |
| Right superior frontal gyrus   |                | 5.00 | 18/50/38        |
| Right orbitofrontal gyrus      |                | 4.52 | 45/26/-19       |
| Supplementary motor area       |                | 4.47 | 0/2/71          |
| Dorsomedial prefrontal cortex  |                | 4.47 | -3/35/50        |
| Left superior frontal gyrus    |                | 4.43 | -18/53/26       |
| Right middle frontal gyrus     |                | 4.16 | 45/35/26        |
| Right anterior insula          |                | 4.13 | 36/11/-13       |
| Medial orbitofrontal cortex    |                | 4.04 | 15/53/-19       |
| Right inferior frontal gyrus   |                | 3.74 | 57/20/5         |
| Right temporal pole            |                | 3.62 | 57/14/-16       |
| Right frontal pole             |                | 3.34 | 18/65/-1        |
| Right angular gyrus            | 627            | 4.75 | 45/-52/41       |
| Right supramarginal gyrus      |                | 4.23 | 54/-34/56       |
| Right superior parietal lobule |                | 4.13 | 42/-46/59       |
| Left middle temporal gyrus     | 442            | 4.53 | -66/-43/-1      |
| Left inferior temporal gyrus   |                | 4.20 | -45/-25/-31     |
| Left temporal pole             |                | 3.47 | -45/5/-46       |
| Left orbitofrontal cortex      | 144            | 4.35 | -36/53/-13      |
| Medial orbitofrontal gyrus     |                | 4.12 | -12/50/-25      |
| Left middle frontal gyrus      |                | 3.43 | -36/59/2        |
| Left angular gyrus             | 234            | 4.08 | -45/-52/32      |
| Left superior parietal lobule  |                | 3.41 | -45/-40/56      |
| Left supramarginal gyrus       |                | 3.24 | -51/-34/53      |
| Right middle frontal gyrus     | 92             | 3.62 | 39/26/38        |

**Note:** Significant regions identified at voxel-level uncorrected  $p < 0.001$  combined with cluster-level  $p < 0.05$  corrected for familywise error based on random field theory; cluster extent represents number of voxels with  $3 \times 3 \times 3$  mm<sup>3</sup> spatial resolution; MNI, Montreal Neurological Institute.

2

1 **Table S4.** Regions showing negative correlation between drug use severity and neural response (conventional cluster-level  $p < 0.05$ )

| <b>Region</b>               | <b>Cluster extent</b> | <b>Z</b> | <b>MNI coordinates</b> |
|-----------------------------|-----------------------|----------|------------------------|
| Right fusiform gyrus        | 103                   | 4.17     | 42/-34/-19             |
| Right middle temporal gyrus |                       | 3.47     | 51/-4/-34              |
| Precuneus                   | 93                    | 3.85     | -3/-73/44              |
| Cuneus                      |                       | 3.69     | -6/-82/38              |

**Note:** Significant regions identified at voxel-level uncorrected  $p < 0.001$  combined with cluster-level  $p < 0.05$  corrected for familywise error based on random field theory; cluster extent represents number of voxels with  $3 \times 3 \times 3$  mm<sup>3</sup> spatial resolution; MNI, Montreal Neurological Institute.

2



1 **Table S5.** Regions showing negative correlation between drug use severity and neural response (conventional voxel-level  $p < 0.05$ )

| <b>Region</b>                 | <b>Cluster extent</b> | <b>Z</b> | <b>MNI coordinates</b> |
|-------------------------------|-----------------------|----------|------------------------|
| Left cerebellum               | 57                    | 5.66     | -33/-85/-28            |
| Left orbitofrontal cortex     | 46                    | 5.59     | -39/20/-19             |
| Anterior cingulate cortex     | 15                    | 5.34     | 0/41/20                |
| Right lingual gyrus           | 24                    | 5.24     | 3/-82/-10              |
| Left occipital pole           | 6                     | 5.09     | -6/-103/2              |
| Right superior frontal gyrus  | 8                     | 5.00     | 18/50/38               |
| Left cerebellum               | 5                     | 4.93     | -42/-58/-46            |
| Right middle temporal gyrus   | 9                     | 4.81     | 57/-43/-1              |
| Right medial prefrontal gyrus | 3                     | 4.80     | 12/56/29               |
| Right angular gyrus           | 4                     | 4.75     | 45/-52/41              |
| Supplementary motor area      | 2                     | 4.68     | 6/26/56                |
| Right lingual gyrus           | 4                     | 4.64     | 15/-91/-19             |
| Left occipital pole           | 1                     | 4.62     | -15/-103/5             |

**Note:** Significant regions identified at voxel-level  $p < 0.05$  corrected for familywise error; cluster extent represents number of voxels with  $3 \times 3 \times 3$  mm<sup>3</sup> spatial resolution; MNI, Montreal Neurological Institute.

2
